# Supplementary material for: Prognostic Capability of TNBC 3-Gene Score among Triple-Negative Breast Cancer Subtypes
Source: MDPI journal article supplement (doi:10.3390/cancers14174286), 2022-09-01
Supplement: s1 [file s1]

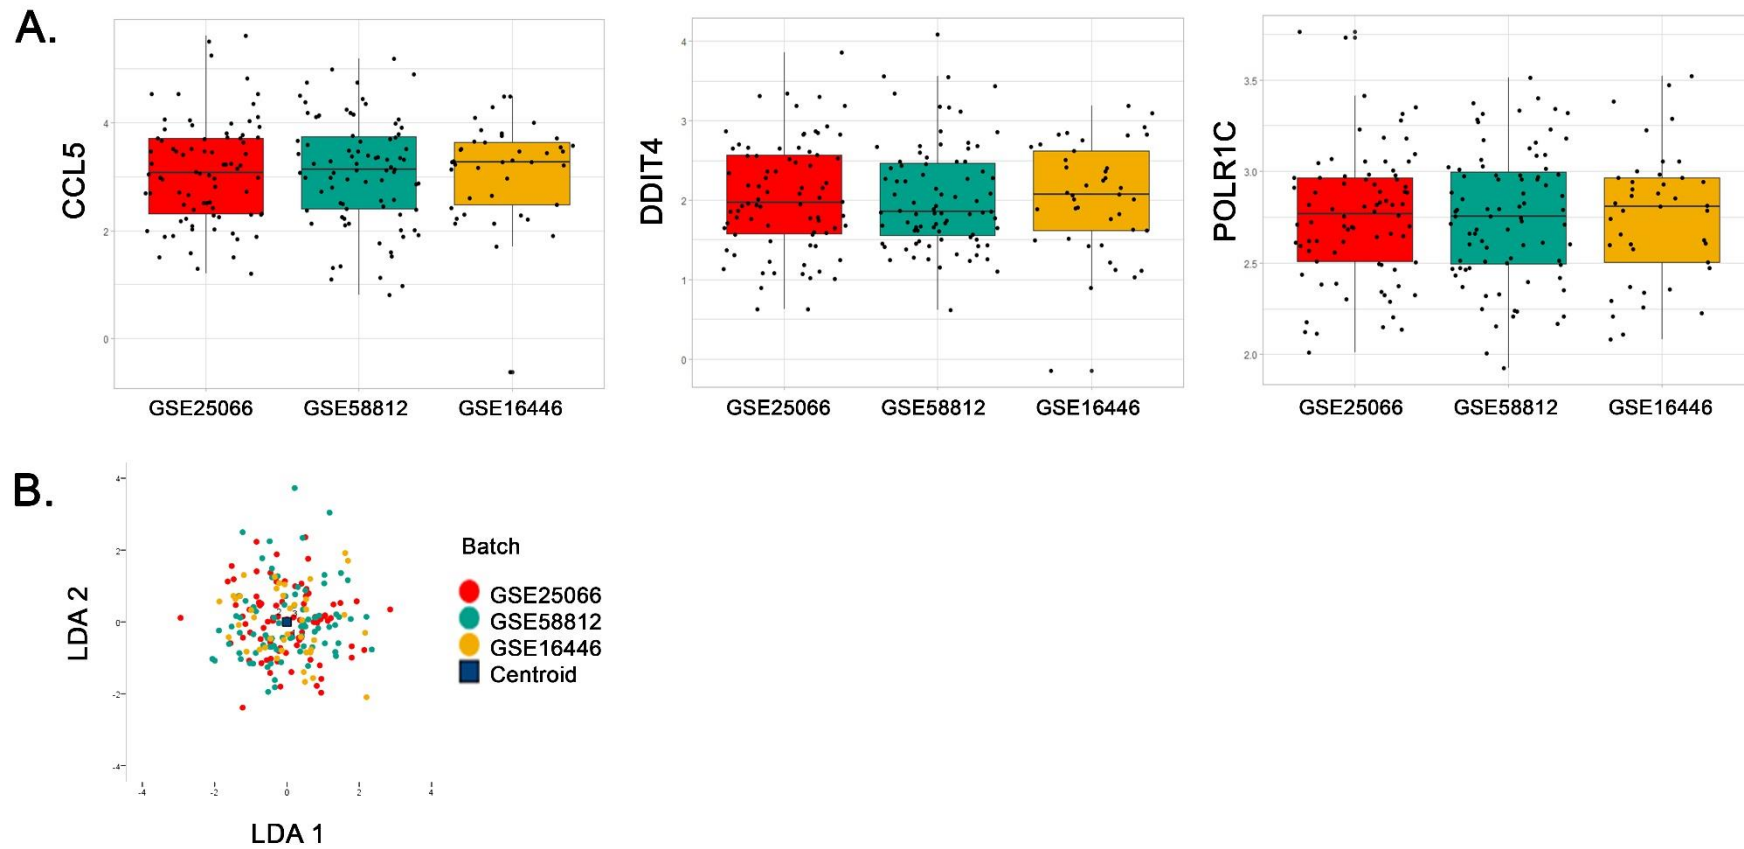

**Figure S1.-** Distribution of *CCL5*, *DDIT4* and *POLR1C* gene expression in three datasets, GSE25064 (n=80), GSE58812 (n=83) and GSE16446 (n=41). **A.** The expression of *CCL5* ( $p=0.869$ ), *DDIT4* ( $p=0.830$ ) and *POLR1C* ( $p=0.991$ ) did not present significant differences between the three databases. **B.** The linear discriminant function (LDA) plot did not show a pattern of grouping in the data.
